# Supplementary material for: Smooth Muscle Cell Phenotypic Switch Induced by Traditional Cigarette Smoke Condensate: A Holistic Overview
Source: MDPI journal article supplement (doi:10.3390/ijms24076431), 2023-03-29
Supplement: s1 [file s1]

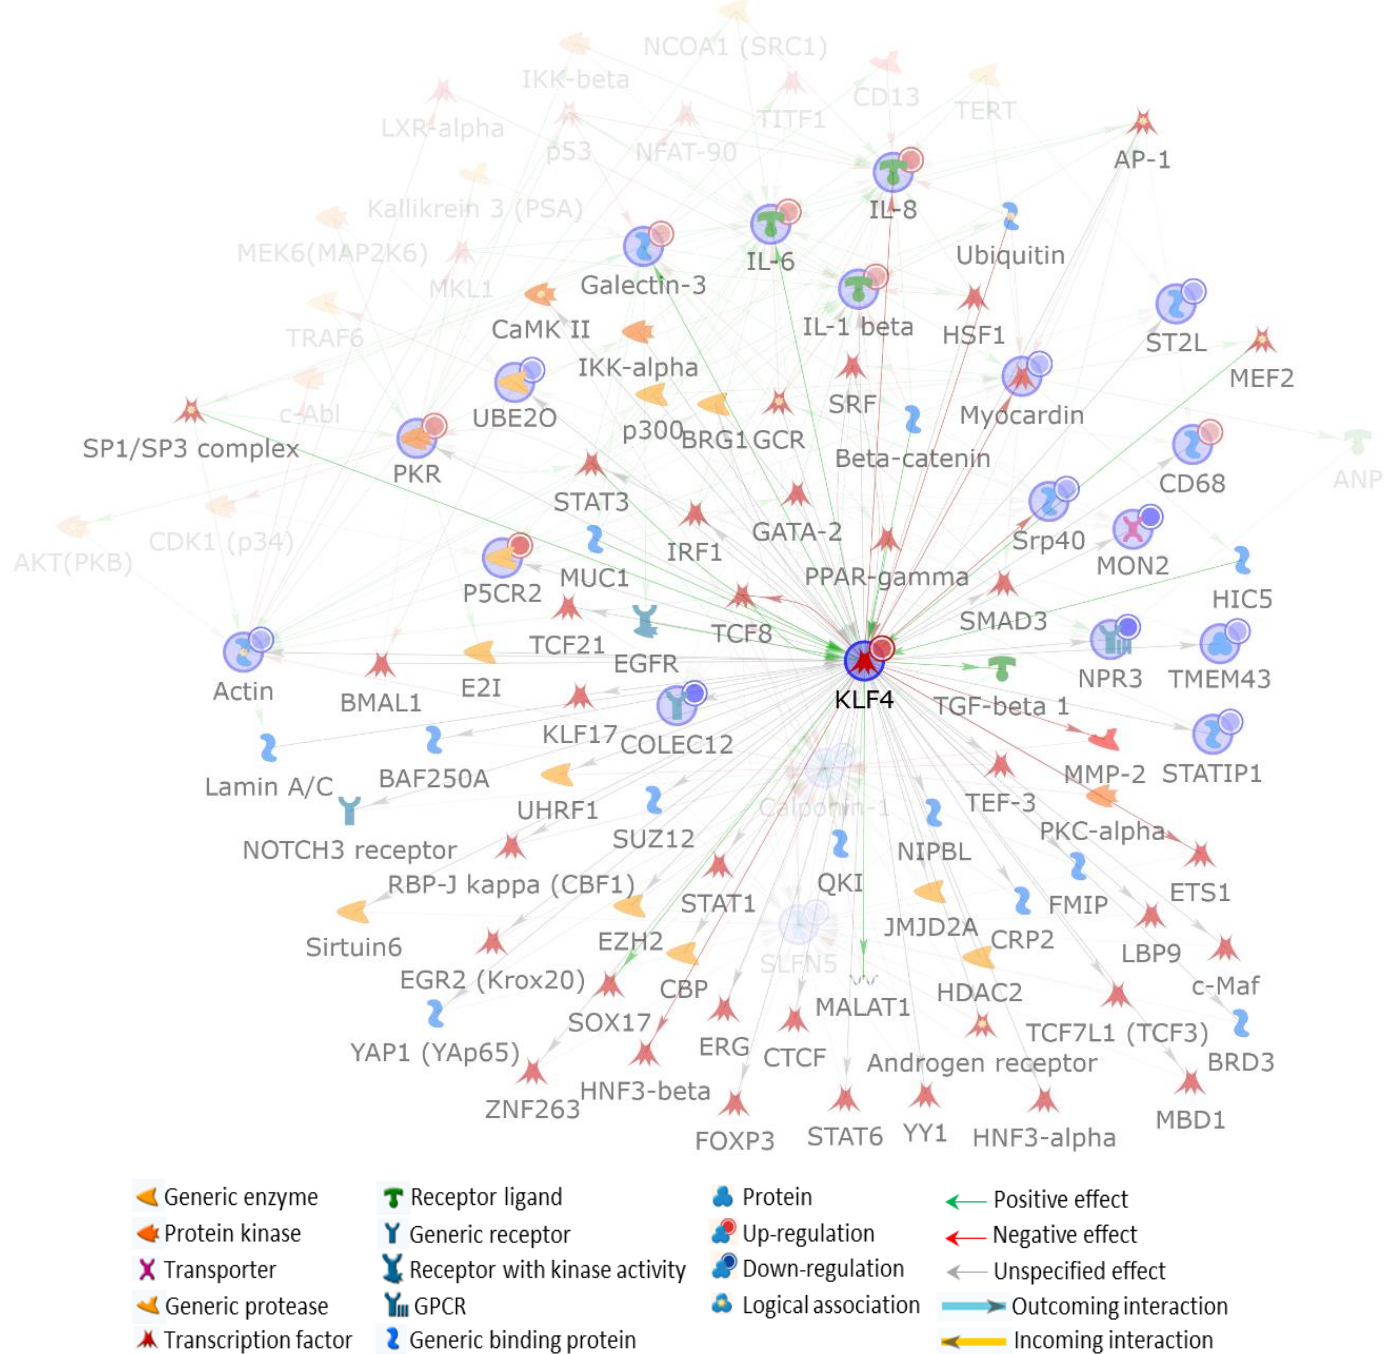

**Figure S1.** Protein/gene hybrid SPN in KLF4-centred trace-mode.

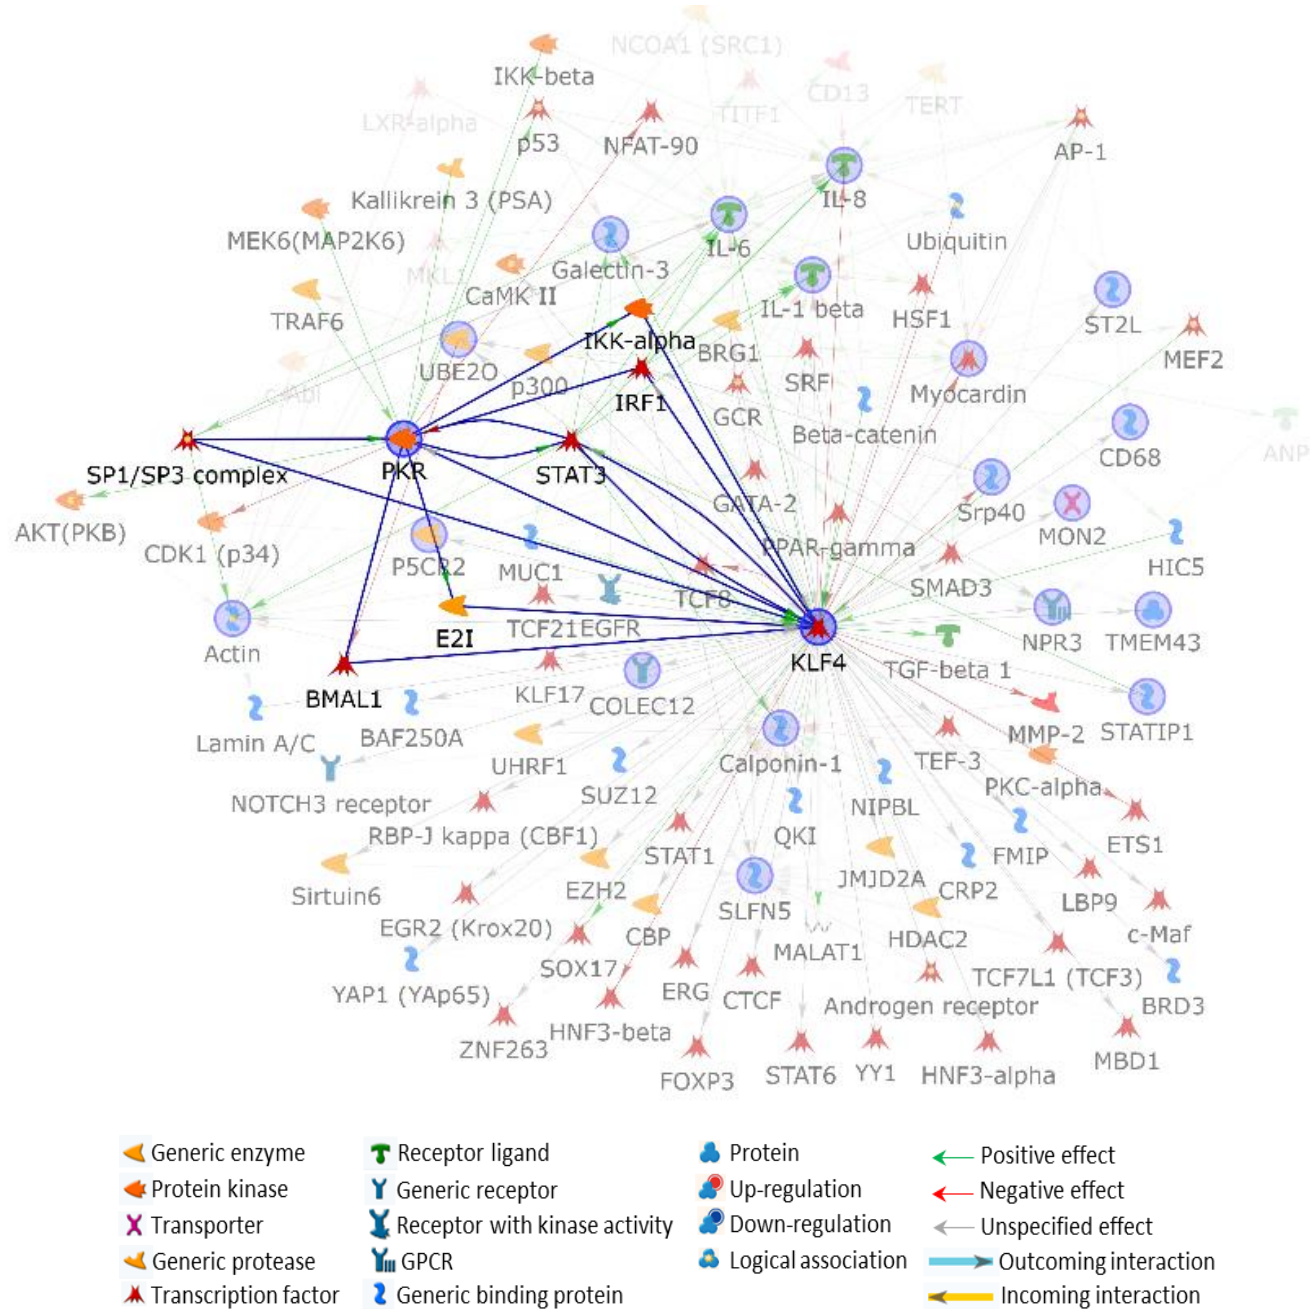

**Figure S2.** Protein/gene hybrid SPN in KLF4 and PKR centred trace-mode and mark-up view of shortest path (two allowed steps) interconnections (bold in blue) among KLF4 and PKR.
